# Supplementary material
Source: PubMed Central journal article supplement (PMC5924634)
Supplement: NIHMS949437-supplement-supplement_1.pdf [file NIHMS949437-supplement-supplement_1.pdf]

**Online Resource 1. Warnings used in trial**

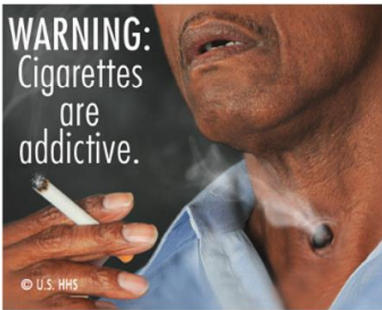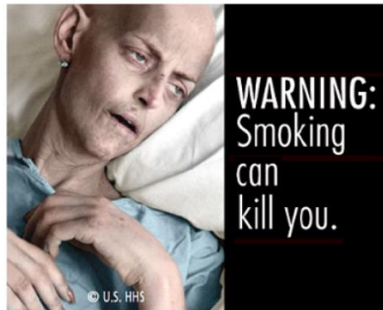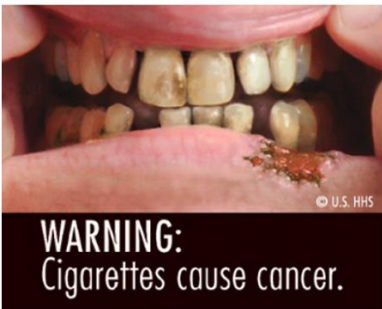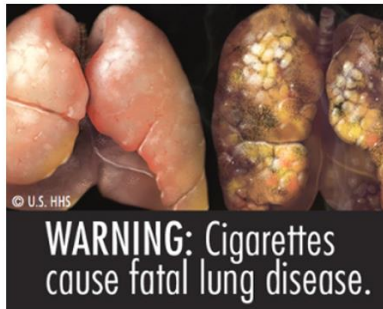

**SURGEON GENERAL'S WARNING:**

Cigarette Smoke Contains  
Carbon Monoxide.

**SURGEON GENERAL'S WARNING:**

Quitting Smoking Now Greatly Reduces  
Serious Risks to Your Health.

**SURGEON GENERAL'S WARNING:**

Smoking by Pregnant Women May Result  
in Fetal Injury, Premature Birth, and  
Low Birth Weight.

**SURGEON GENERAL'S WARNING:**

Smoking Causes Lung Cancer, Heart Disease,  
Emphysema, and May Complicate Pregnancy.
