# Supplementary material
Source: PubMed Central journal article supplement (PMC5924634)
Supplement: NIHMS949437-supplement-supplement_2.pdf [file NIHMS949437-supplement-supplement_2.pdf]

**Online Resource 2.** Participant characteristics at baseline

|                                                    | Text-only warnings<br>( <i>n</i> =1,078) |        | Pictorial warnings<br>( <i>n</i> =1,071) |        |
|----------------------------------------------------|------------------------------------------|--------|------------------------------------------|--------|
|                                                    | <i>n</i>                                 | (%)    | <i>n</i>                                 | (%)    |
| Age                                                |                                          |        |                                          |        |
| 18-24 years                                        | 171                                      | (16.1) | 152                                      | (14.5) |
| 25-39 years                                        | 377                                      | (35.5) | 398                                      | (37.9) |
| 40-54 years                                        | 338                                      | (31.8) | 304                                      | (29.0) |
| 55+ years                                          | 176                                      | (16.6) | 195                                      | (18.6) |
| Mean (SD)                                          | 39.7                                     | (13.4) | 39.8                                     | (13.7) |
| Sex                                                |                                          |        |                                          |        |
| Male                                               | 507                                      | (47.4) | 532                                      | (50.0) |
| Female                                             | 548                                      | (51.2) | 512                                      | (48.2) |
| Transgender                                        | 15                                       | (1.4)  | 19                                       | (1.8)  |
| Gay, lesbian, or bisexual                          | 173                                      | (16.3) | 195                                      | (18.8) |
| Hispanic                                           | 92                                       | (8.6)  | 89                                       | (8.5)  |
| Race                                               |                                          |        |                                          |        |
| White                                              | 393                                      | (37.2) | 358                                      | (34.3) |
| Black or African American                          | 484                                      | (45.8) | 510                                      | (48.9) |
| American Indian or Alaska Native                   | 7                                        | (.6)   | 11                                       | (1.0)  |
| Asian                                              | 28                                       | (2.7)  | 42                                       | (4.0)  |
| Native Hawaiian/other Pacific Islander             | 11                                       | (1.0)  | 6                                        | (.6)   |
| Other/multiracial                                  | 134                                      | (12.7) | 117                                      | (11.2) |
| Education                                          |                                          |        |                                          |        |
| High school degree or less                         | 333                                      | (31.1) | 344                                      | (32.5) |
| Some college                                       | 519                                      | (48.5) | 502                                      | (47.4) |
| College graduate                                   | 156                                      | (14.6) | 156                                      | (14.7) |
| Graduate degree                                    | 63                                       | (5.9)  | 58                                       | (5.5)  |
| Low income ( $\leq$ 150% of federal poverty level) |                                          |        |                                          |        |
| No                                                 | 506                                      | (47.0) | 477                                      | (44.8) |
| Yes                                                | 570                                      | (53.0) | 589                                      | (55.2) |
| Household income, annual                           |                                          |        |                                          |        |
| \$0-\$24,999                                       | 566                                      | (53.3) | 589                                      | (55.8) |
| \$25,000-\$49,999                                  | 272                                      | (25.6) | 266                                      | (25.2) |
| \$50,000-\$74,999                                  | 110                                      | (10.3) | 92                                       | (8.7)  |
| \$75,000+                                          | 115                                      | (10.8) | 109                                      | (10.3) |
| Trial site                                         |                                          |        |                                          |        |
| California                                         | 594                                      | (55.1) | 592                                      | (55.3) |
| North Carolina                                     | 484                                      | (44.9) | 479                                      | (44.7) |
| Previous exposure to pictorial warnings            | 247                                      | (23.2) | 240                                      | (22.6) |
| Trait reactance, mean (SD)                         | 2.86                                     | (.7)   | 2.89                                     | (.7)   |
| Cigarettes smoked per day, mean (SD)               | 9.1                                      | (6.5)  | 9.0                                      | (7.2)  |
| Quit intentions                                    | 2.2                                      | (.9)   | 2.3                                      | (.9)   |
| Support for pictorial warning policy               |                                          |        |                                          |        |

---

|                              |     |        |     |        |
|------------------------------|-----|--------|-----|--------|
| Strongly oppose this policy  | 50  | (4.6)  | 47  | (4.4)  |
| Somewhat oppose this policy  | 125 | (11.6) | 138 | (12.9) |
| Somewhat support this policy | 426 | (39.6) | 414 | (38.8) |
| Strongly support this policy | 476 | (44.2) | 469 | (43.9) |

---

*Note.* Missing demographic data range from 0% to 2.2%. Characteristics did not differ by trial arm.
